# Supplementary material
Source: Springer Nature journal article supplement (https://www.springermedizin.de/resource/supplementary/12992_2006_28_MOESM3_ESM.pdf/9616296)

# Patterns of overweight and obesity in 1988 & 2000

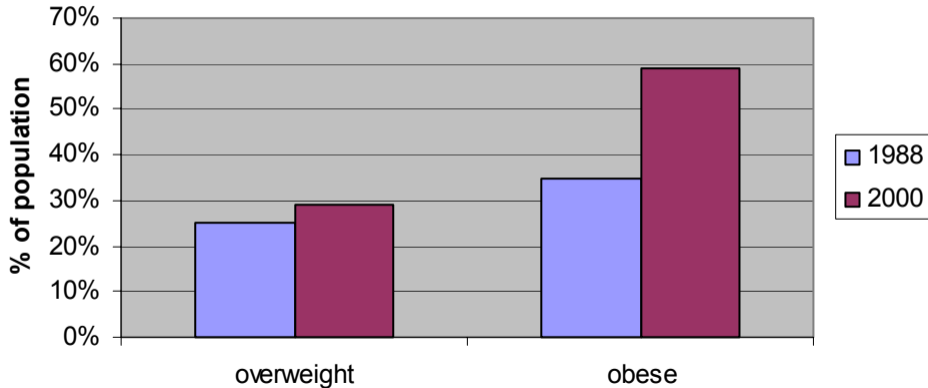

Supplement: MOESM3 [file 9616296]
